# Supplementary material
Source: publisher figshare collection journal article supplement (https://acs.figshare.com/ndownloader/files/11323676)
Supplement: Supplementary file 1 [file 11323676]

# Supporting Information for The Role of Surface States in Silver-Doped CdSe and CdSe/CdS Quantum Dots

David Morgan and David F. Kelley

*Chemistry and Chemical Biology, University of California Merced,  
5200 North Lake Road, Merced, CA 95343*

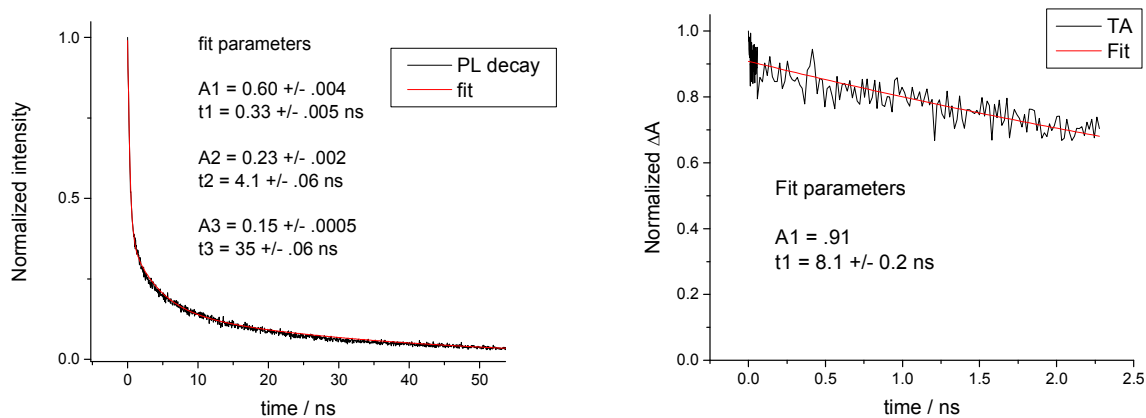

Figure S1. Fits to PL (left) and TA (right) decays of undoped, zincblende, TBP-ligated, 3.0 nm diameter CdSe particles.

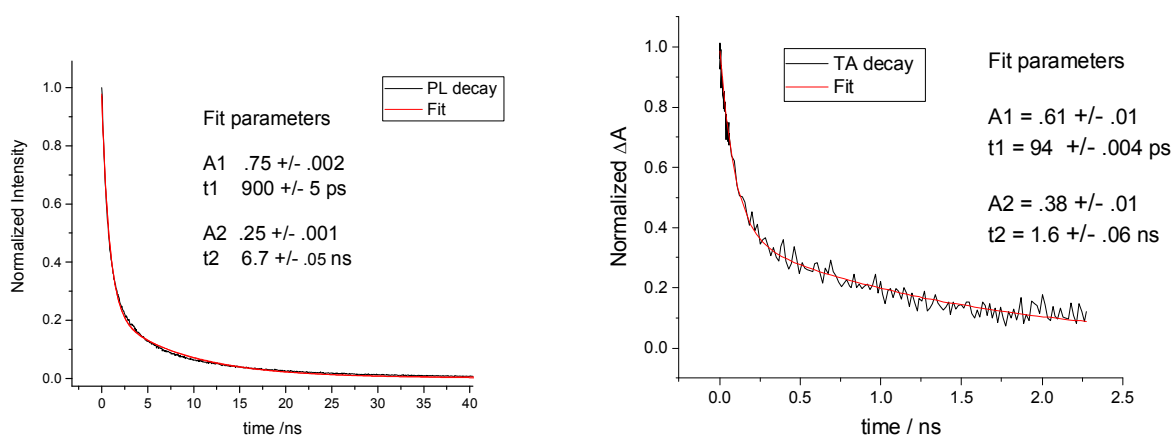

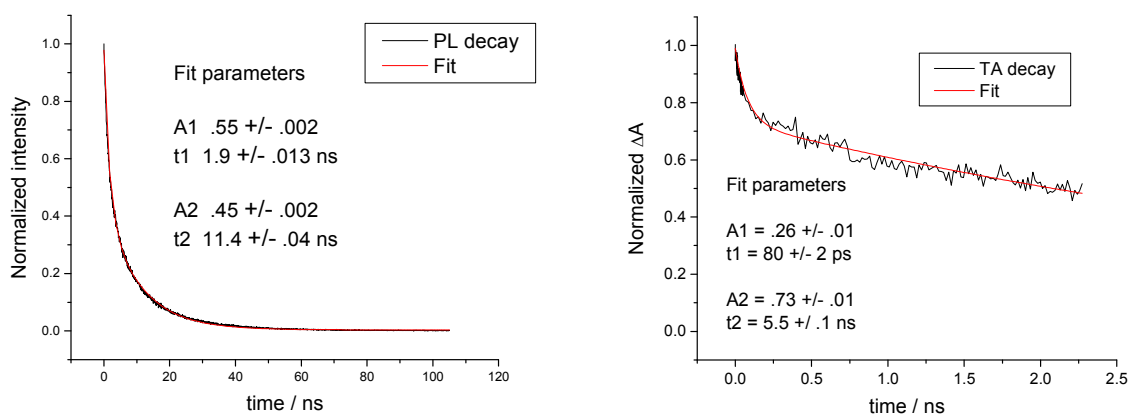

Figure S2. Fits to PL (left) and TA (right) decays for undoped (upper) and 2-ML 6 Ag/particle (lower) CdSe/CdS particles ligated with oleylamine. Fitting the long-time (0.25 – 2.0 ns) TA decay gives a time that is intermediate between the (biphasic) PL decay times.

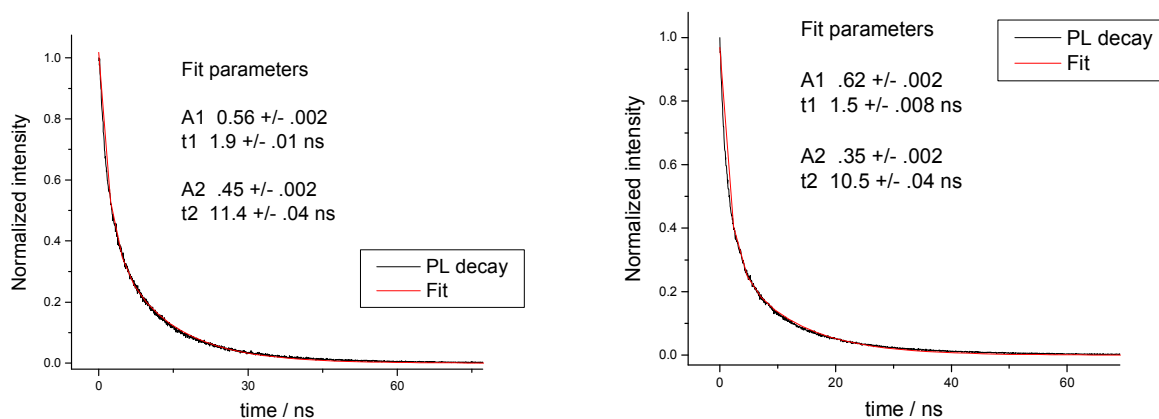

Figure S3. Fits to PL decays for 3 (left) and 10 (right) Ag/particle 2-ML CdSe/CdS particles ligated with oleylamine.

Figures S1, S2 and S3 report uncertainties as the sigma values a from a Levenberg-Marquardt curve fitting algorithm, however, based on several repeats of these experiments we estimate the errors are generally about  $\pm 10\%$ .

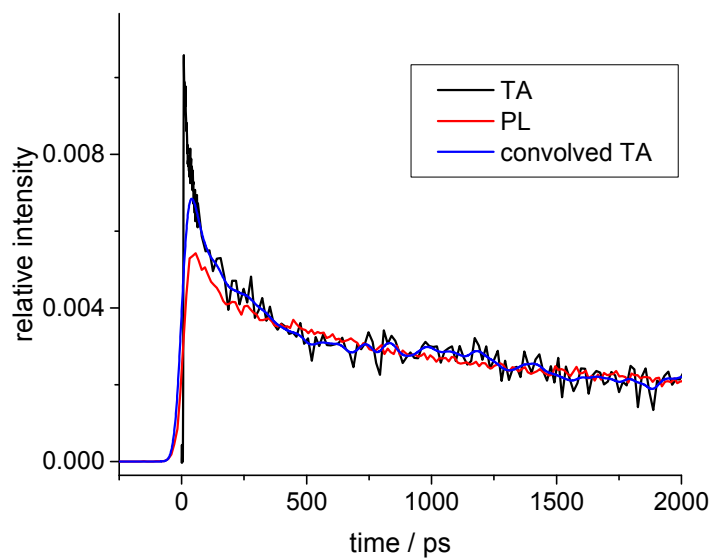

Figure S4. A comparison of the TA bleach recovery and PL decay kinetics. These PL kinetics were taken with a microchannel plate PMT detector, having about 45 ps temporal resolution. Also shown is a curve which is the TA kinetics convolved with the PL instrument response function.
